# Supplementary material for: Crystal engineering and structural diversity of 2-aminopyridinium hypodiphosphates obtained by crystallization and dehydration
Source: Royal Society of Chemistry journal article supplement (doi:10.1039/d2ce00261b), 2022-01-01
Supplement: d2ce00261b3.pdf [file d2ce00261b3.pdf]

## Supporting information

FT-IR analyses of compounds were performed using nujol mulls technique with a wavelength between 4000 to 400  $\text{cm}^{-1}$ . The recorded spectra are shown in Figures S1–S4. The absorption frequencies around 2925, 1462, 1377  $\text{cm}^{-1}$  are derived from nujol. Absorption frequencies 3388–3343  $\text{cm}^{-1}$  (N–H stretching), 2725–2706  $\text{cm}^{-1}$  (aromatic C–H stretching), 1671–1619  $\text{cm}^{-1}$  (N–H in-plane bending), 1600–1300  $\text{cm}^{-1}$  (aromatic C=C stretching), 950–700  $\text{cm}^{-1}$  (ring breathing), 660–620  $\text{cm}^{-1}$  ( $\text{NH}_2$  out-of-plane bending) and 560–552  $\text{cm}^{-1}$  (C–N–C out-of-plane bending) confirm the 2-aminopyridinium ring in the crystals. The visible bands between 1330–1260  $\text{cm}^{-1}$  correspond to the P–O(H) group, so it can be concluded that the hypodiphosphate anions are not completely deprotonated. In the frequency range 1120–910  $\text{cm}^{-1}$  bands from the P–O functional group are visible, and in the range 700–430  $\text{cm}^{-1}$  – O–P–O groups.

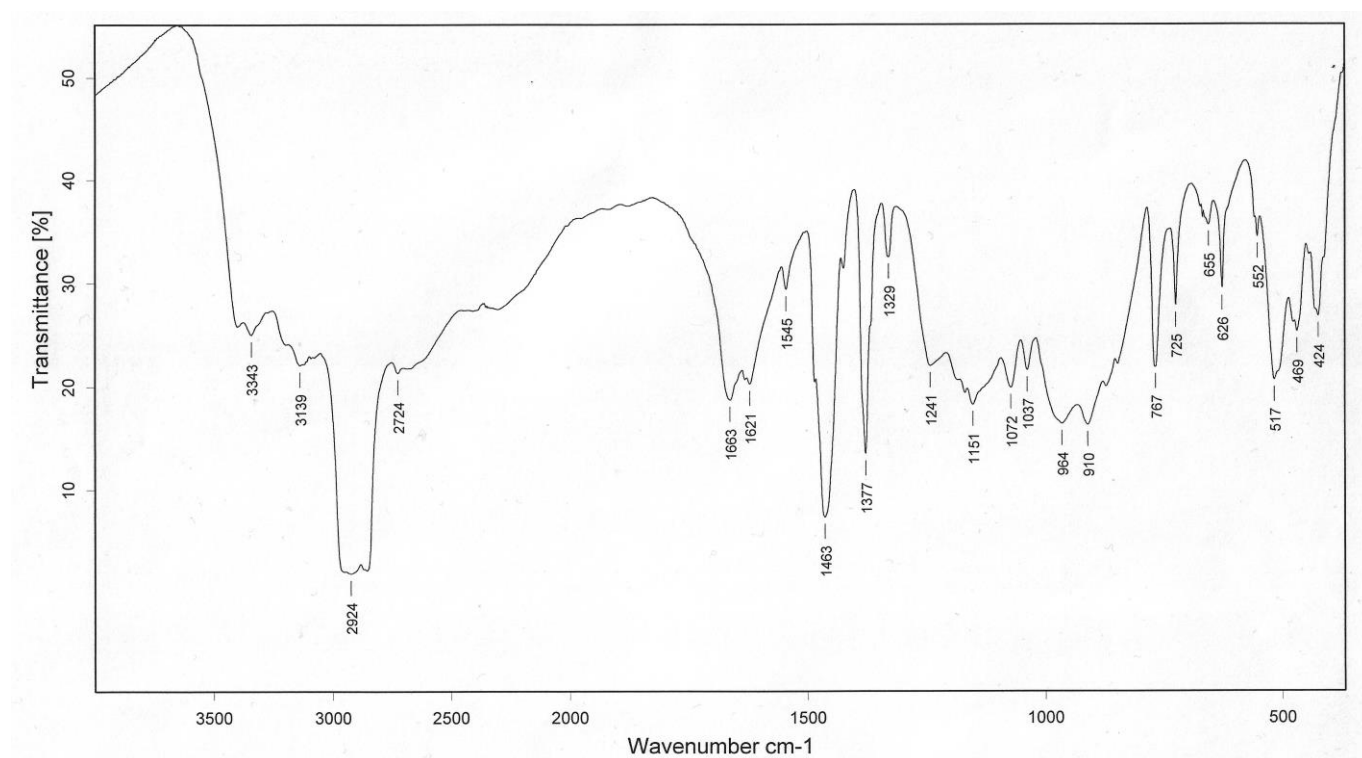

**Figure S1.** FT-IR spectrum of (1).

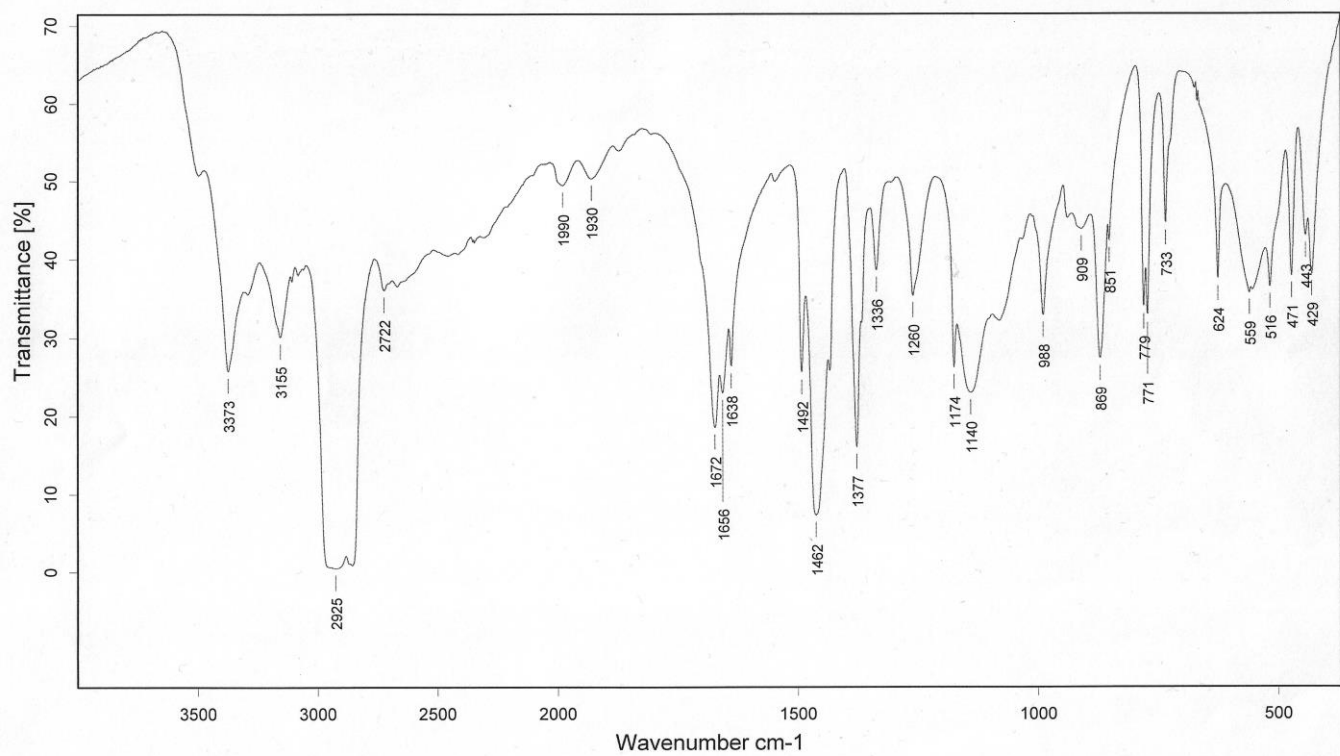

Figure S2. FT-IR spectrum of (4).

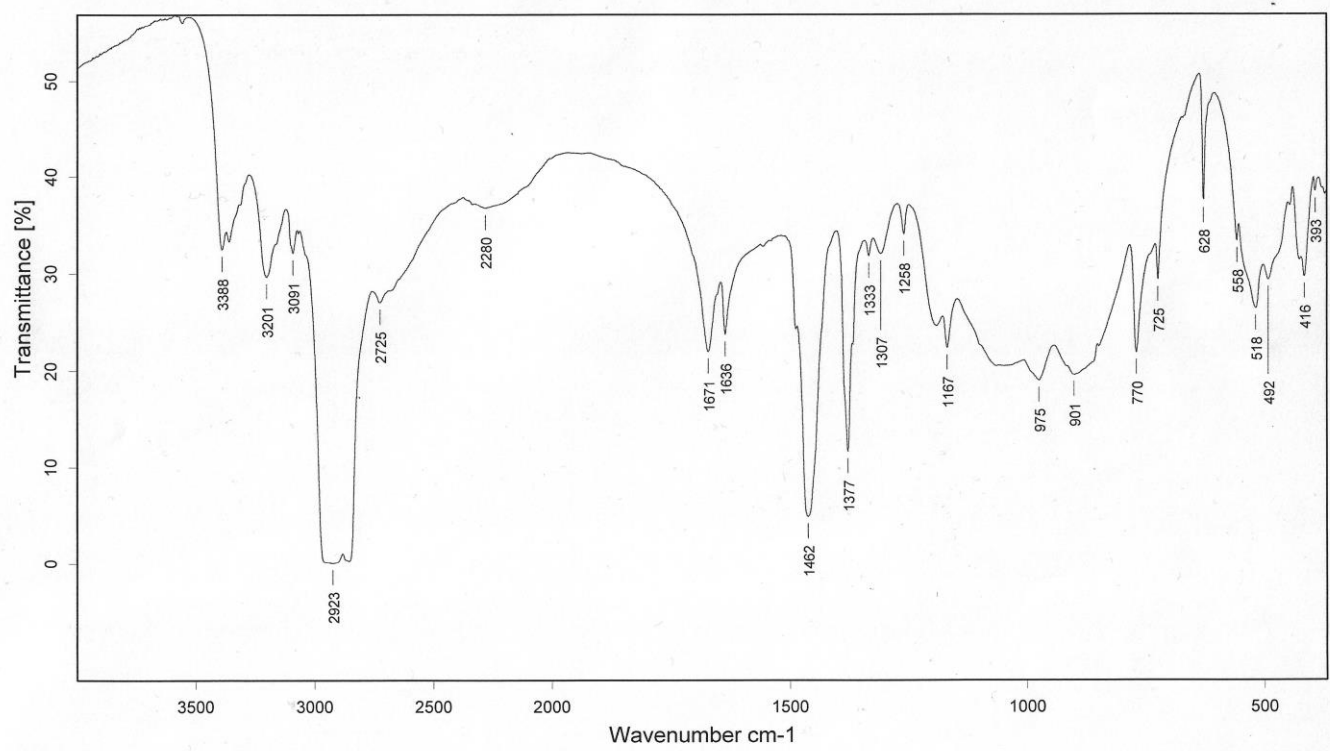

Figure S3. FT-IR spectrum of (6).

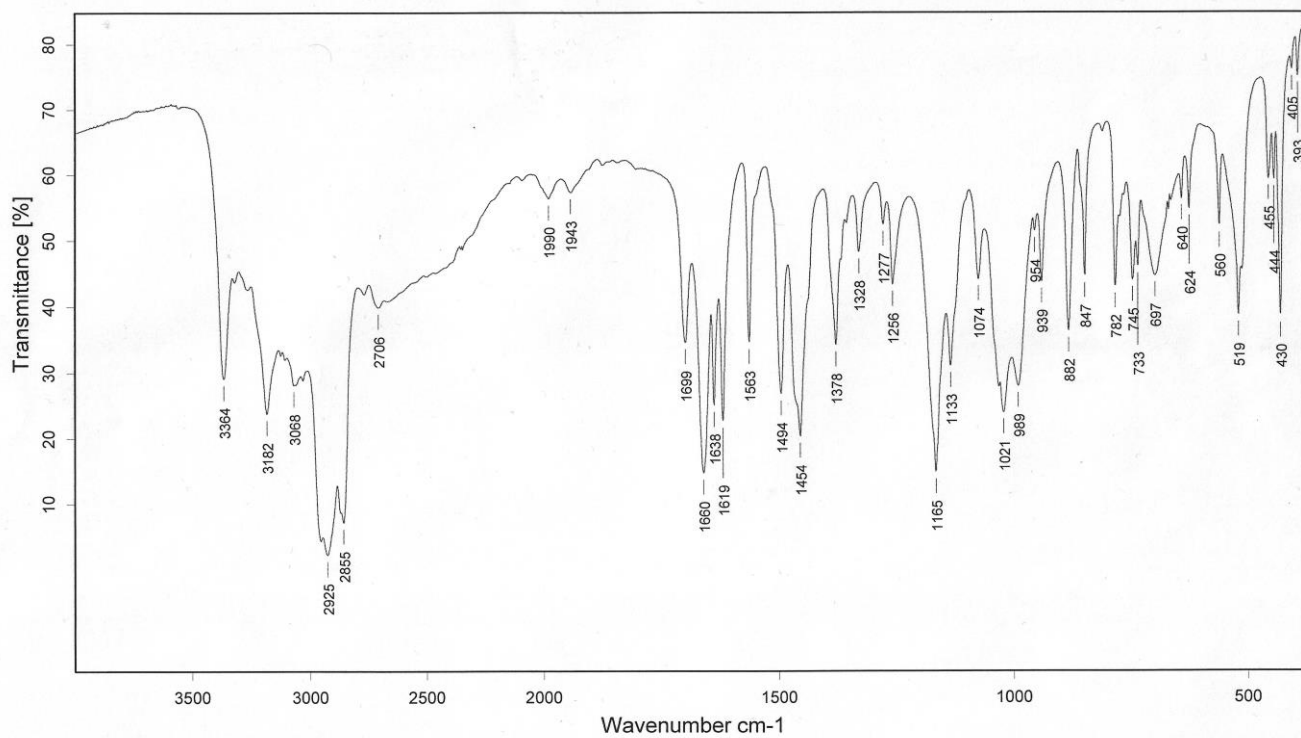

Figure S4. FT-IR spectrum of (7).

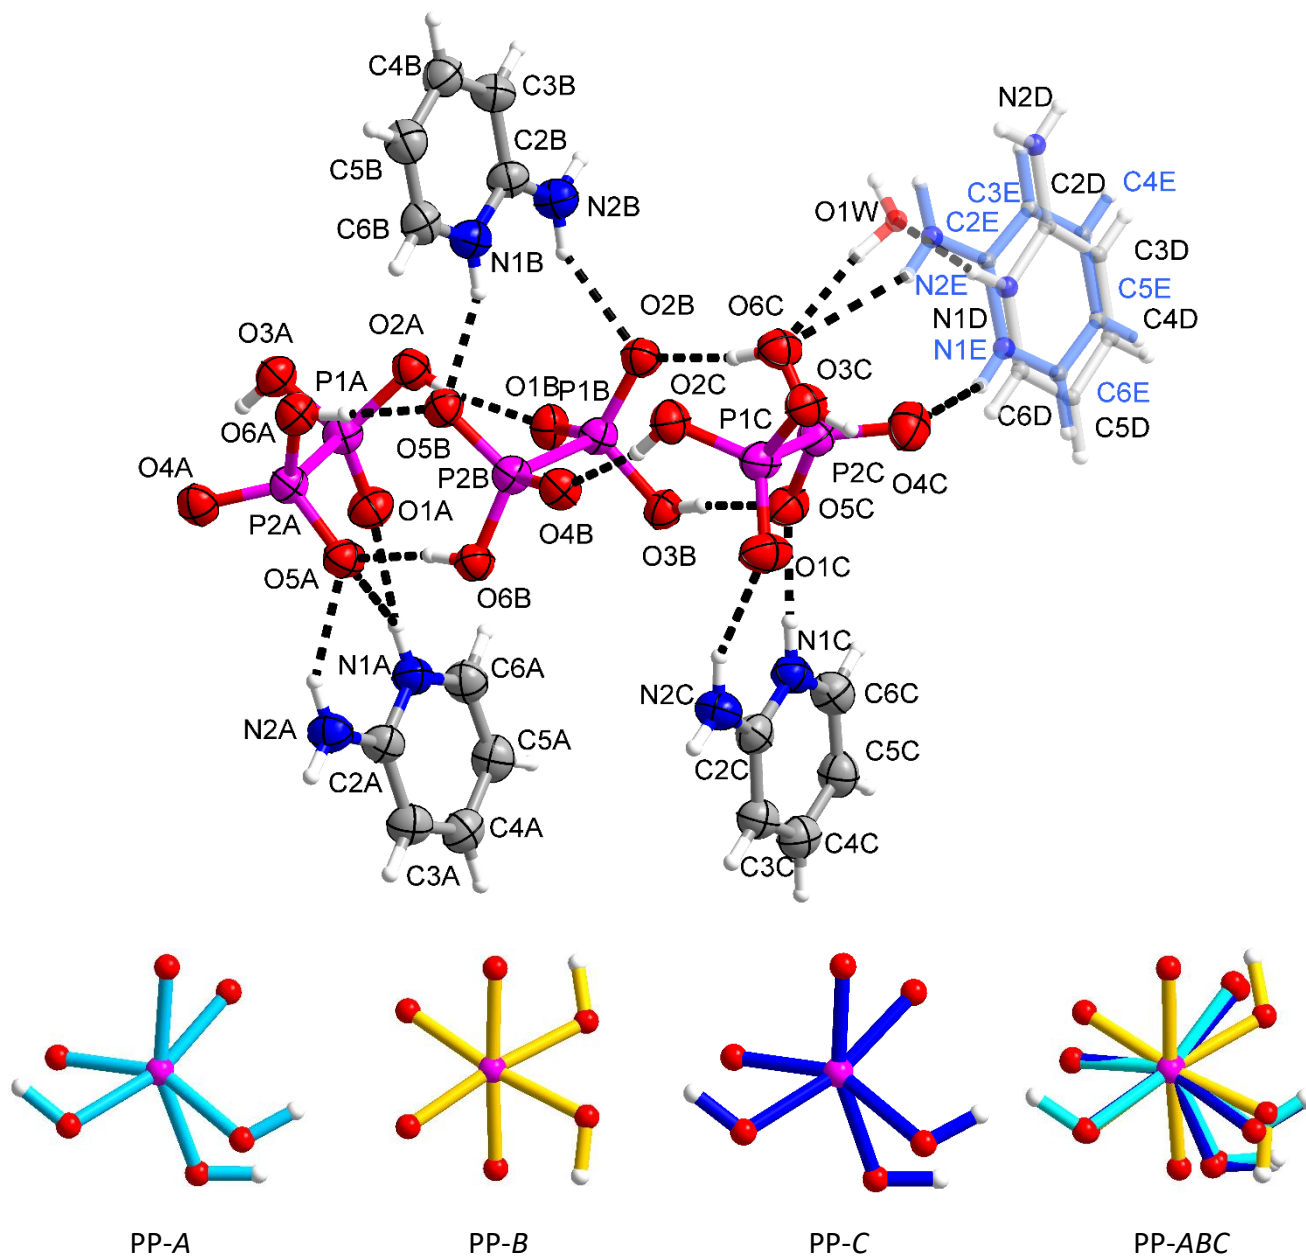

**Figure S5.** Asymmetric unit of (2) showing the atom-numbering scheme and symmetry-independent hydrogen bonds (dashed lines). Different positions of disordered 2-aminopyridinium cation are shown with different colours (total SOF = 1). Displacement ellipsoids are shown at 50% probability level. The anions and a comparison of their conformation are shown at the bottom (the common reference points are the P1, P2 and O1 atoms). The yellow colour represents the dianions and the shades of blue – monoanions.

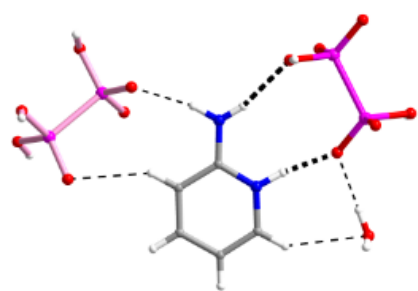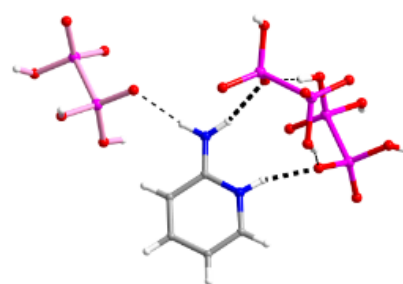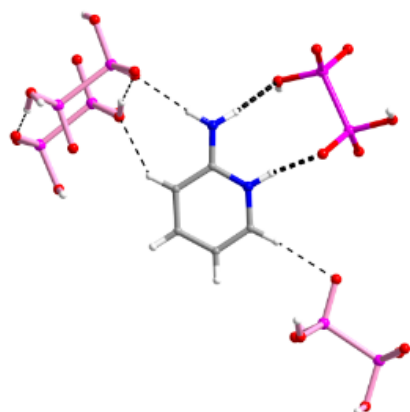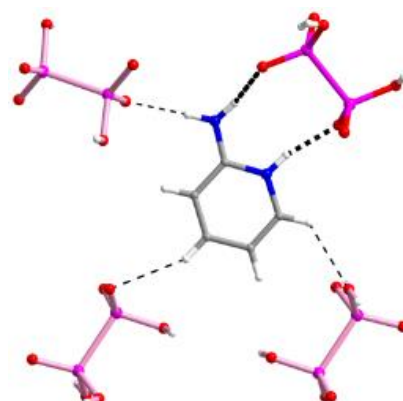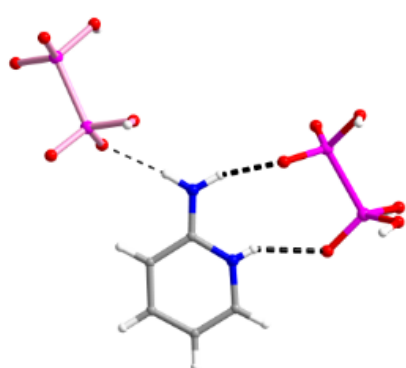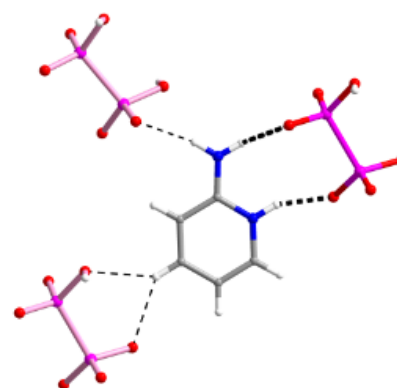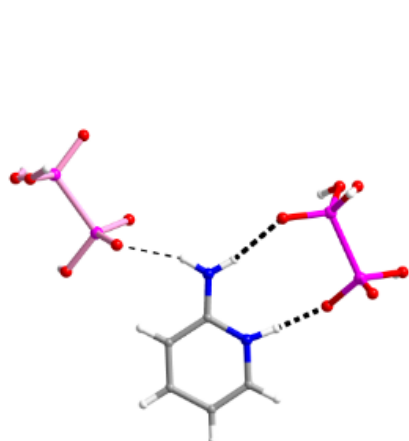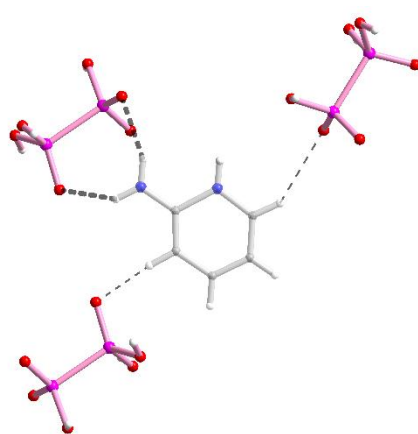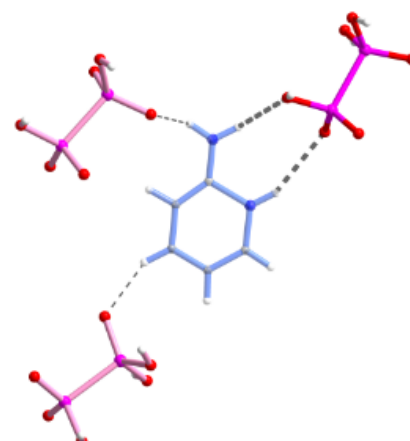

**Figure S6.** Hydrogen bond connections between the anions and the cations in the crystals of (1) and (3).

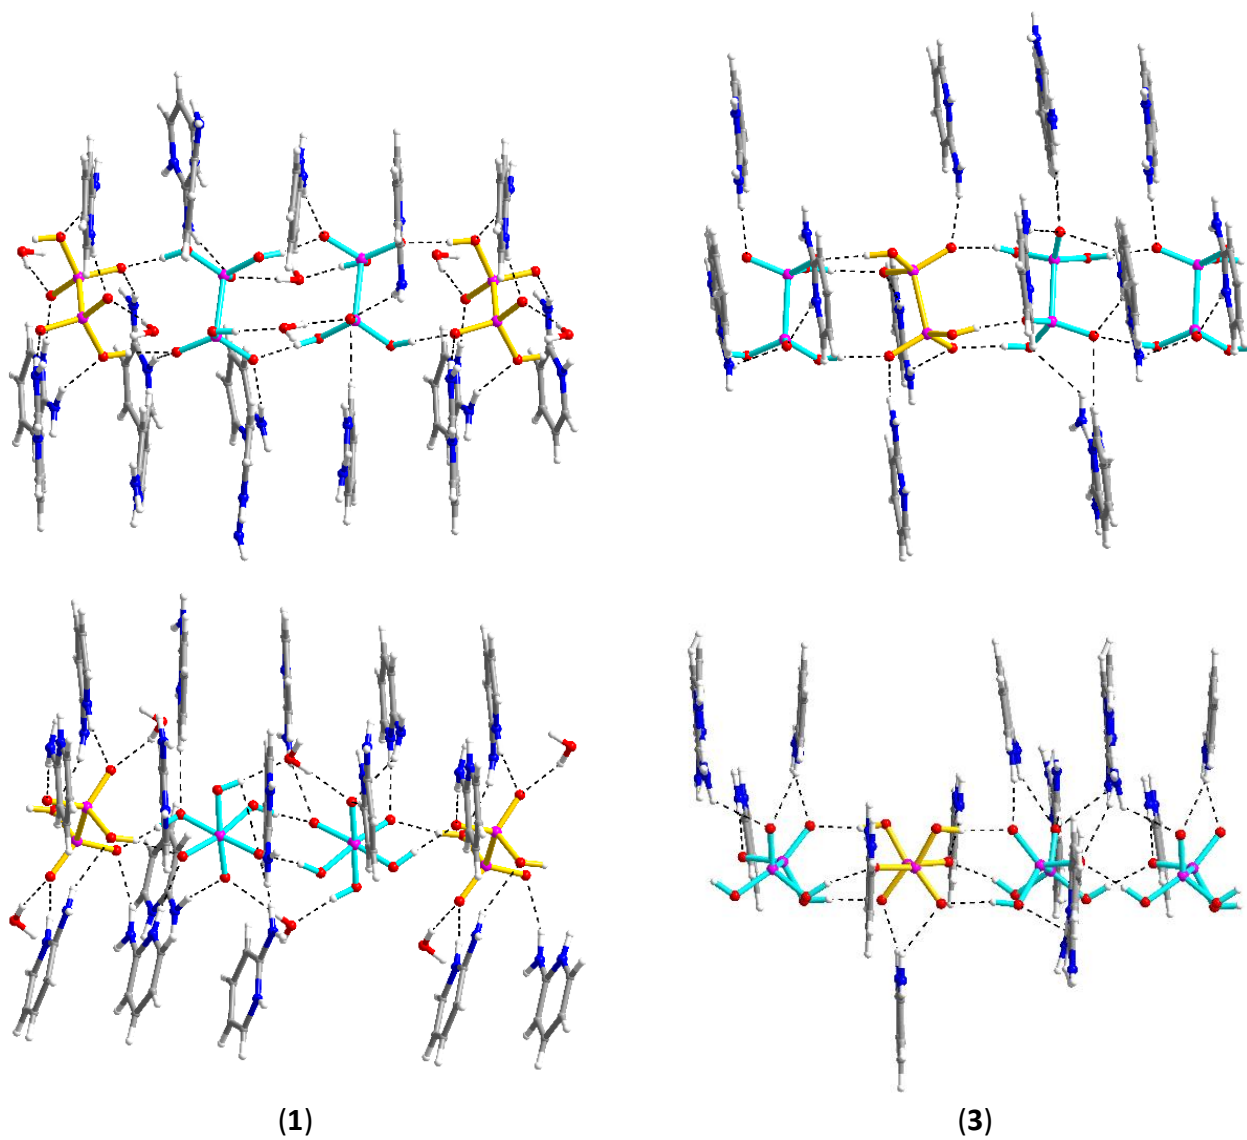

**Figure S7.** The environment of the anions in crystals **(1)** and **(3)**. Hydrogen bonds are shown with dashed lines. The turquoise colour represents monoanions and the yellow – dianions.

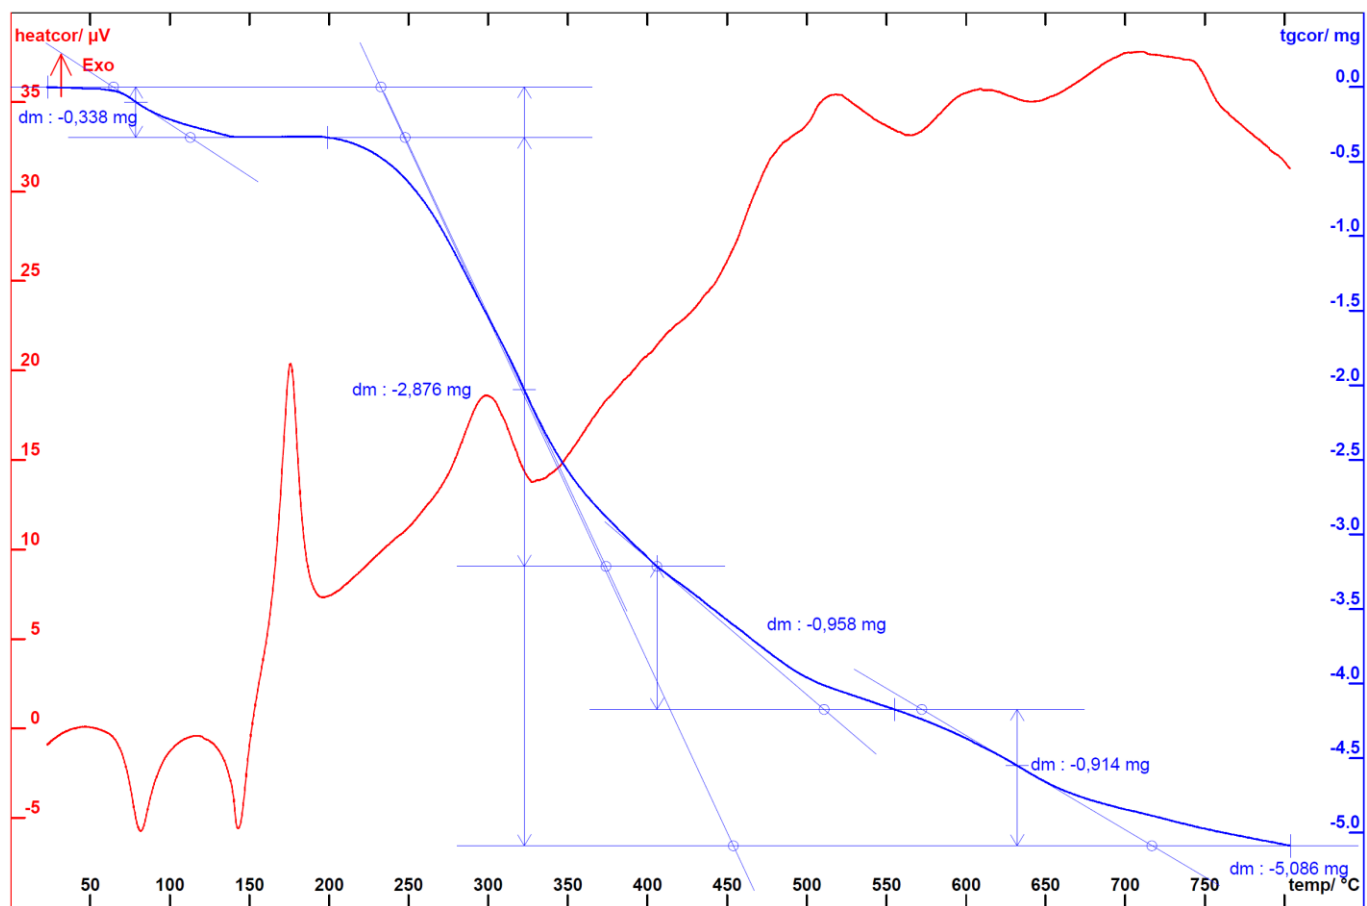

Figure S8. TGA/DTA curves for (1) (m = 9.606 mg).

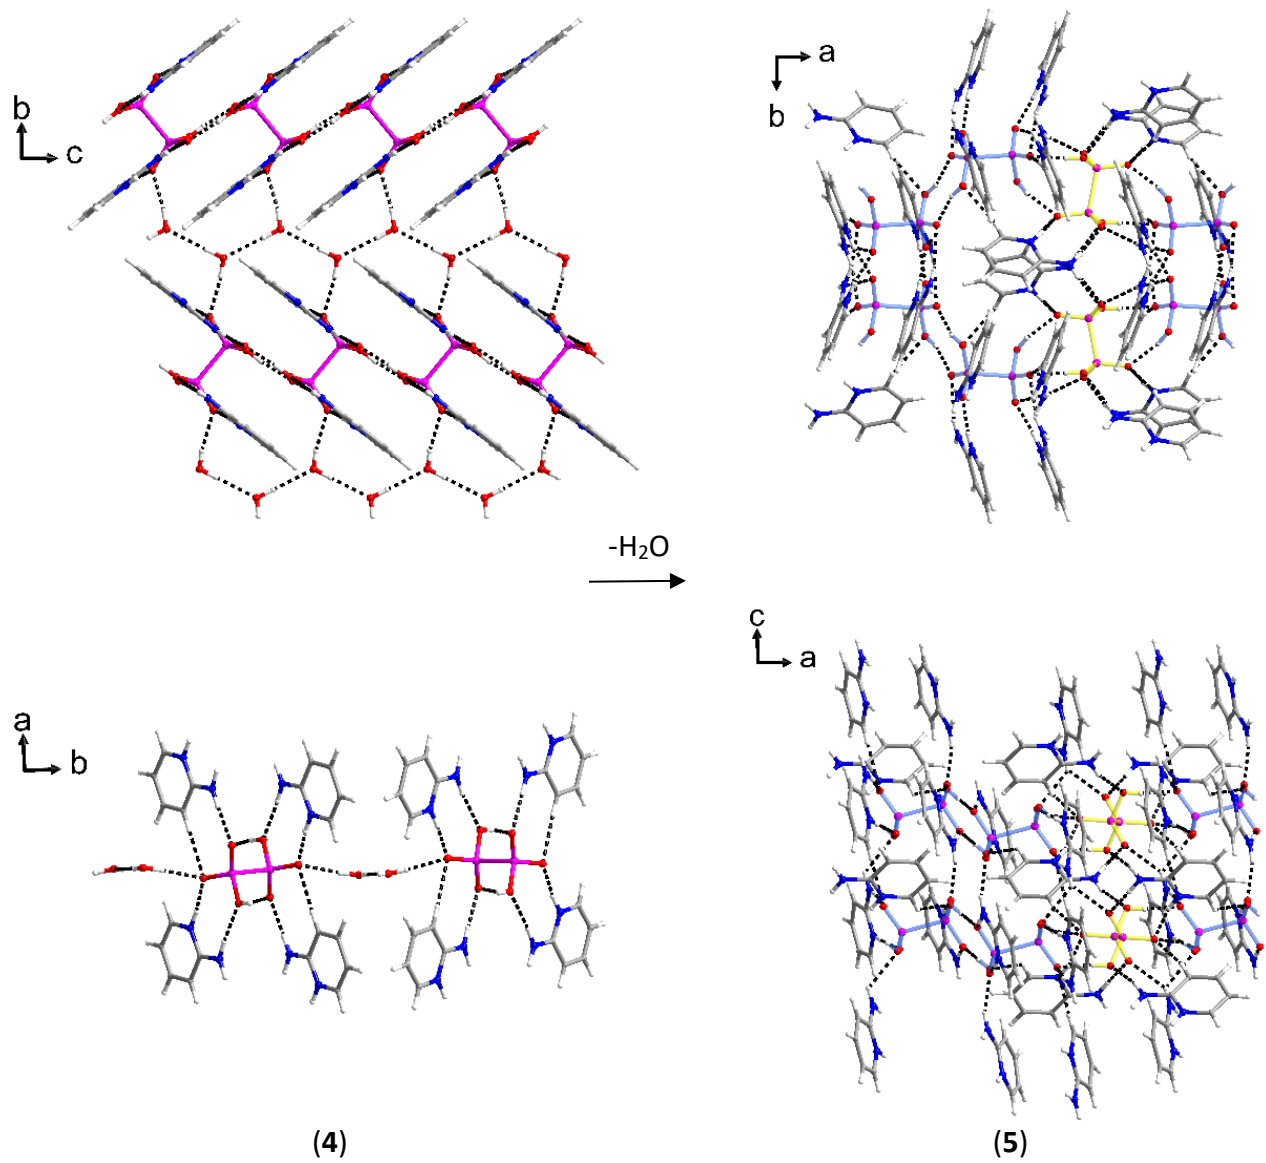

**Figure S9.** Crystal packing of (4) and (5). Hydrogen bonds are shown with dashed lines.



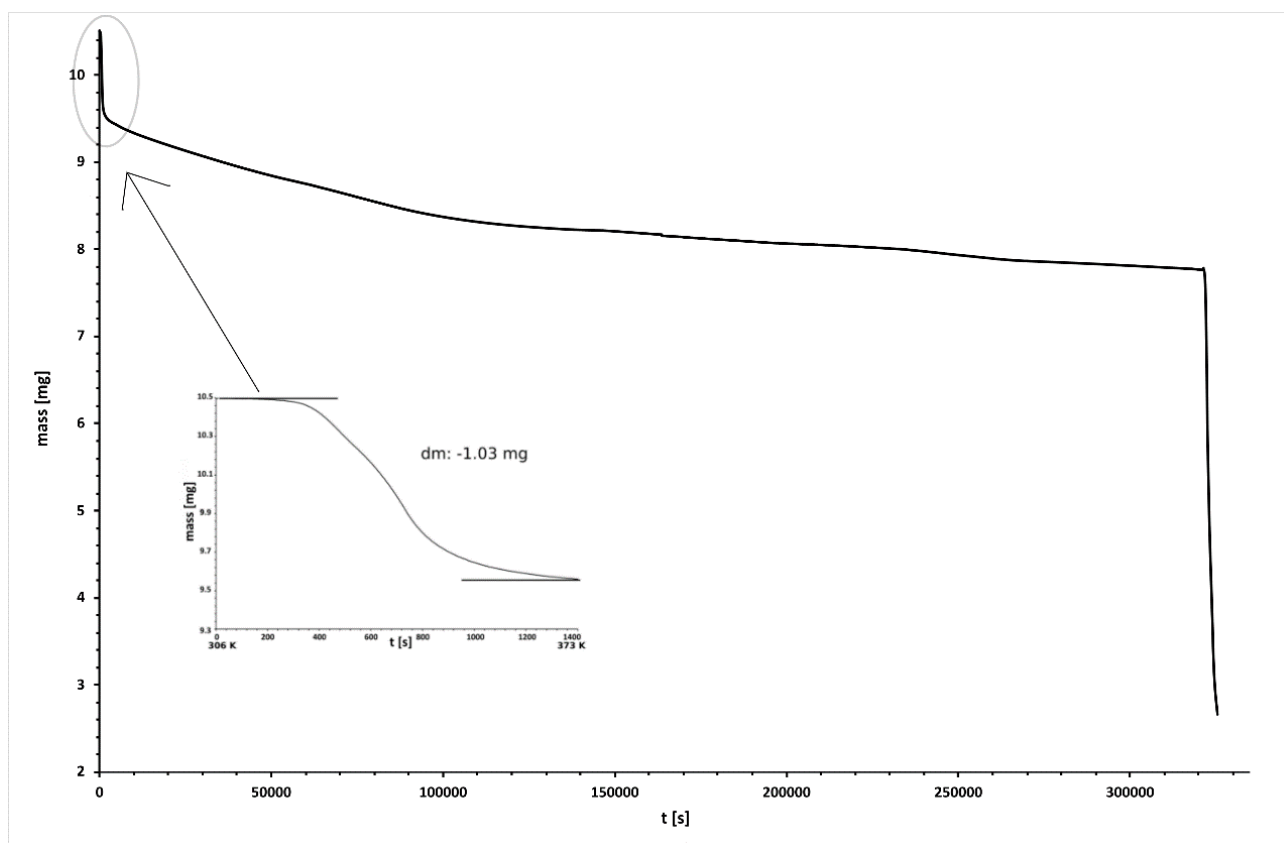

(a)

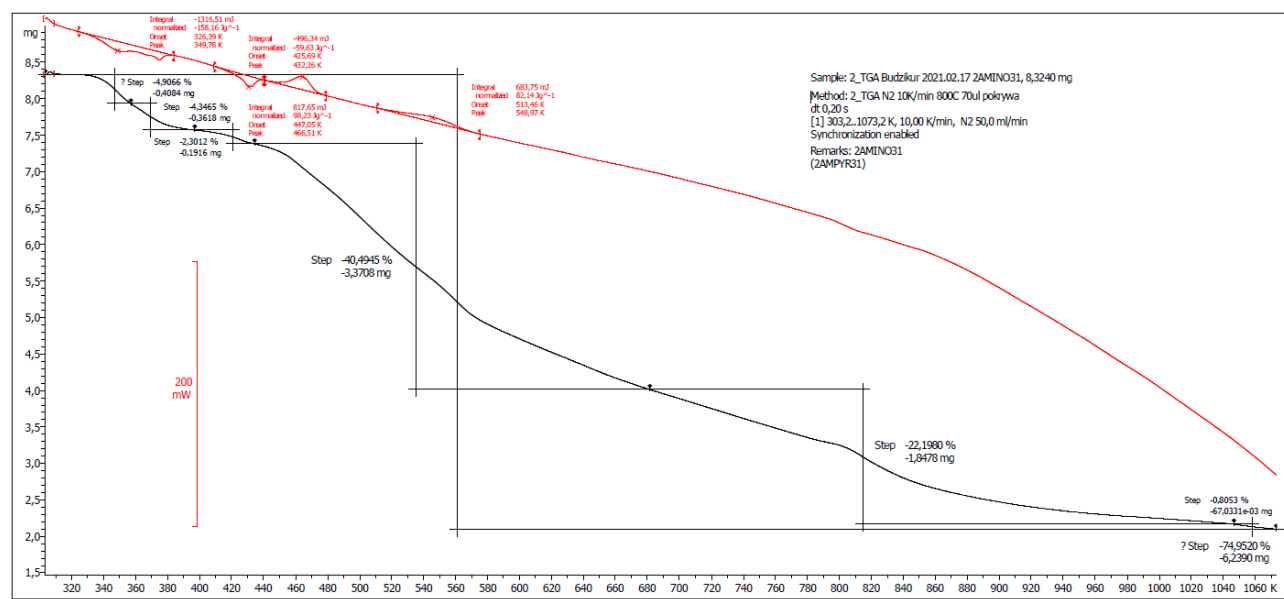

(b)

**Figure S10.** (a) TGA curve for (4) ( $m = 10.496$  mg) shown as mass vs time. The measurement for 72 h was carried out in an isotherm at 378 K and then the sample was heated to 1073 K. The magnified area corresponds to the escape of water from the crystal. (b) TGA/DSC of (4) ( $m = 8.324$  mg) shown as mass vs temperature.

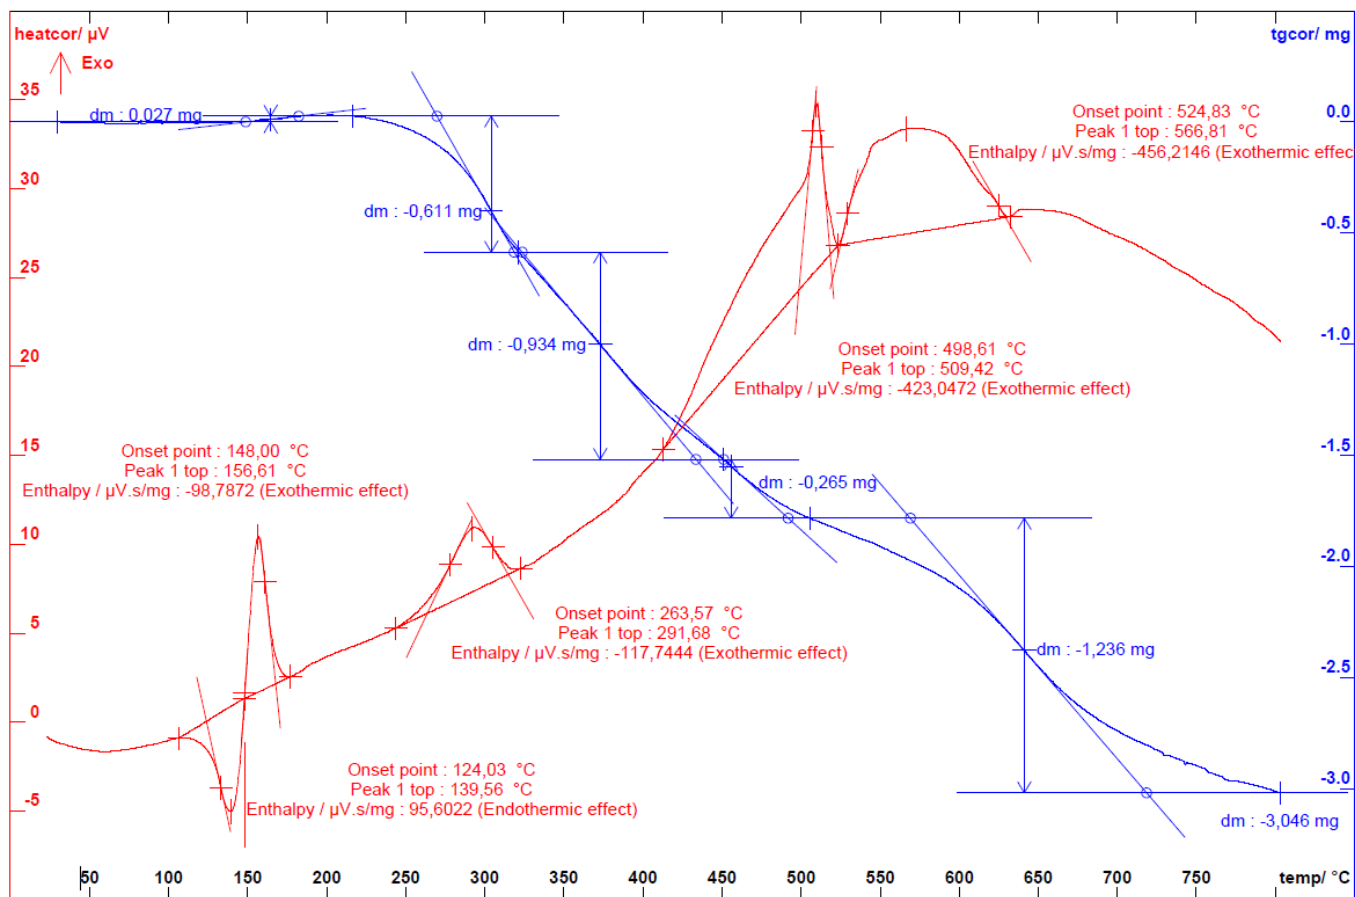

Figure S11. TGA/DTA curves for (6) (m = 5.538 mg).

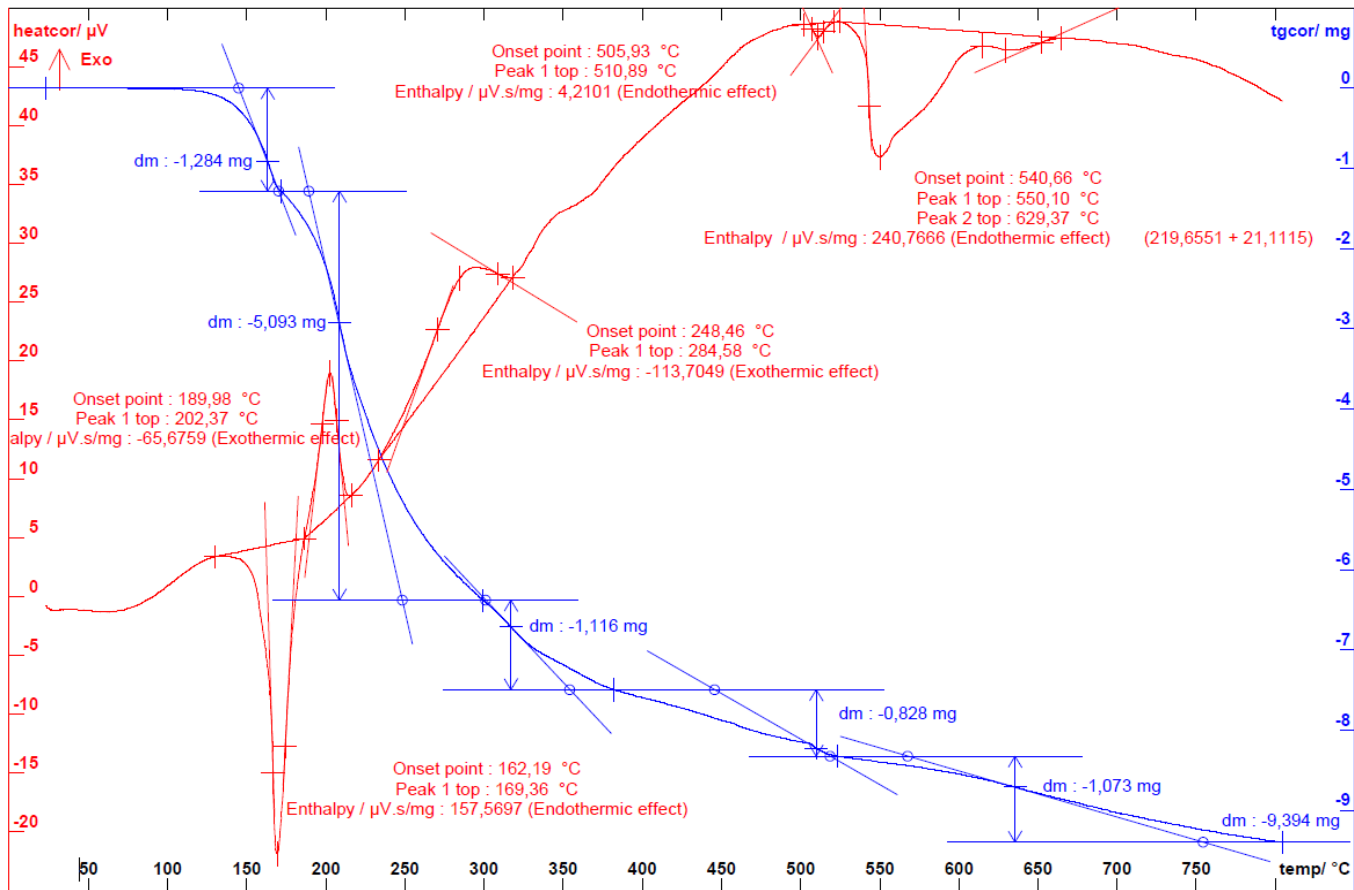

Figure S12. TGA/DTA curves for (7) (m = 12.6 mg).

Table S1. Selected geometric parameters (Å, °) for (1)

|                 |            |                 |            |
|-----------------|------------|-----------------|------------|
| P1A—O1A         | 1.5030(11) | P2B—O4B         | 1.5062(12) |
| P1A—O2A         | 1.5096(12) | P2B—O5B         | 1.5093(12) |
| P1A—O3A         | 1.5807(12) | P2B—O6B         | 1.5700(12) |
| P1A—P2A         | 2.1790(6)  | P1C—O1C         | 1.4936(12) |
| P2A—O4A         | 1.5019(12) | P1C—O2C         | 1.5484(12) |
| P2A—O5A         | 1.5088(12) | P1C—O3C         | 1.5544(12) |
| P2A—O6A         | 1.5844(12) | P1C—P2C         | 2.1810(6)  |
| P1B—O1B         | 1.4968(12) | P2C—O4C         | 1.5091(12) |
| P1B—O2B         | 1.5468(12) | P2C—O5C         | 1.5117(12) |
| P1B—O3B         | 1.5555(12) | P2C—O6C         | 1.5618(12) |
| P1B—P2B         | 2.1815(6)  |                 |            |
| O1A—P1A—O2A     | 115.77(7)  | O4B—P2B—O5B     | 115.77(7)  |
| O1A—P1A—O3A     | 110.91(6)  | O4B—P2B—O6B     | 108.90(7)  |
| O2A—P1A—O3A     | 107.42(7)  | O5B—P2B—O6B     | 111.00(7)  |
| O1A—P1A—P2A     | 108.55(5)  | O4B—P2B—P1B     | 107.73(5)  |
| O2A—P1A—P2A     | 108.78(5)  | O5B—P2B—P1B     | 107.08(5)  |
| O3A—P1A—P2A     | 104.84(5)  | O6B—P2B—P1B     | 105.83(5)  |
| O4A—P2A—O5A     | 116.69(7)  | O1C—P1C—O2C     | 115.74(7)  |
| O4A—P2A—O6A     | 111.75(7)  | O1C—P1C—O3C     | 114.87(7)  |
| O5A—P2A—O6A     | 106.44(7)  | O2C—P1C—O3C     | 103.21(7)  |
| O4A—P2A—P1A     | 108.78(5)  | O1C—P1C—P2C     | 108.21(5)  |
| O5A—P2A—P1A     | 109.27(5)  | O2C—P1C—P2C     | 105.87(5)  |
| O6A—P2A—P1A     | 103.02(5)  | O3C—P1C—P2C     | 108.38(5)  |
| O1B—P1B—O2B     | 115.19(7)  | O4C—P2C—O5C     | 114.37(7)  |
| O1B—P1B—O3B     | 114.65(7)  | O4C—P2C—O6C     | 109.11(7)  |
| O2B—P1B—O3B     | 103.58(7)  | O5C—P2C—O6C     | 111.87(7)  |
| O1B—P1B—P2B     | 109.82(5)  | O4C—P2C—P1C     | 107.13(5)  |
| O2B—P1B—P2B     | 105.28(5)  | O5C—P2C—P1C     | 106.84(5)  |
| O3B—P1B—P2B     | 107.62(5)  | O6C—P2C—P1C     | 107.14(5)  |
| O1A—P1A—P2A—O4A | -176.76(7) | O3B—P1B—P2B—O5B | -177.54(7) |
| O2A—P1A—P2A—O4A | 56.48(7)   | O1B—P1B—P2B—O6B | 175.50(7)  |
| O3A—P1A—P2A—O4A | -58.18(7)  | O2B—P1B—P2B—O6B | 50.93(7)   |
| O1A—P1A—P2A—O5A | -48.33(7)  | O3B—P1B—P2B—O6B | -59.07(7)  |
| O2A—P1A—P2A—O5A | -175.09(7) | O1C—P1C—P2C—O4C | 63.67(7)   |
| O3A—P1A—P2A—O5A | 70.24(7)   | O2C—P1C—P2C—O4C | -171.66(7) |
| O1A—P1A—P2A—O6A | 64.54(7)   | O3C—P1C—P2C—O4C | -61.49(7)  |
| O2A—P1A—P2A—O6A | -62.22(7)  | O1C—P1C—P2C—O5C | -59.31(7)  |
| O3A—P1A—P2A—O6A | -176.89(6) | O2C—P1C—P2C—O5C | 65.36(7)   |
| O1B—P1B—P2B—O4B | -68.12(7)  | O3C—P1C—P2C—O5C | 175.53(7)  |
| O2B—P1B—P2B—O4B | 167.30(7)  | O1C—P1C—P2C—O6C | -179.35(7) |
| O3B—P1B—P2B—O4B | 57.30(7)   | O2C—P1C—P2C—O6C | -54.68(7)  |
| O1B—P1B—P2B—O5B | 57.03(7)   | O3C—P1C—P2C—O6C | 55.49(7)   |
| O2B—P1B—P2B—O5B | -67.54(7)  |                 |            |

Table S2. Selected geometric parameters (Å, °) for (3)

|                 |            |                 |            |
|-----------------|------------|-----------------|------------|
| P1A—O1A         | 1.483(5)   | P2B—O4B         | 1.492(4)   |
| P1A—O3A         | 1.549(5)   | P2B—O5B         | 1.506(4)   |
| P1A—O2A         | 1.551(5)   | P2B—O6B         | 1.564(4)   |
| P1A—P2A         | 2.192(2)   | P1C—O1C         | 1.492(5)   |
| P2A—O4A         | 1.491(5)   | P1C—O2C         | 1.537(5)   |
| P2A—O5A         | 1.504(4)   | P1C—O3C         | 1.542(5)   |
| P2A—O6A         | 1.571(5)   | P1C—P2C         | 2.202(3)   |
| P1B—O2B         | 1.502(5)   | P2C—O4C         | 1.481(5)   |
| P1B—O1B         | 1.509(4)   | P2C—O5C         | 1.496(5)   |
| P1B—O3B         | 1.553(4)   | P2C—O6C         | 1.567(5)   |
| P1B—P2B         | 2.196(2)   |                 |            |
| O1A—P1A—O3A     | 115.6(3)   | O4B—P2B—O5B     | 117.2(3)   |
| O1A—P1A—O2A     | 116.4(3)   | O4B—P2B—O6B     | 106.7(3)   |
| O3A—P1A—O2A     | 101.7(3)   | O5B—P2B—O6B     | 111.7(2)   |
| O1A—P1A—P2A     | 106.8(2)   | O4B—P2B—P1B     | 108.94(19) |
| O3A—P1A—P2A     | 108.3(2)   | O5B—P2B—P1B     | 105.17(17) |
| O2A—P1A—P2A     | 107.6(2)   | O6B—P2B—P1B     | 106.65(19) |
| O4A—P2A—O5A     | 115.1(3)   | O1C—P1C—O2C     | 115.6(3)   |
| O4A—P2A—O6A     | 109.7(3)   | O1C—P1C—O3C     | 115.0(3)   |
| O5A—P2A—O6A     | 110.6(3)   | O2C—P1C—O3C     | 101.9(3)   |
| O4A—P2A—P1A     | 109.0(2)   | O1C—P1C—P2C     | 108.3(2)   |
| O5A—P2A—P1A     | 104.5(2)   | O2C—P1C—P2C     | 107.8(2)   |
| O6A—P2A—P1A     | 107.46(19) | O3C—P1C—P2C     | 107.8(2)   |
| O2B—P1B—O1B     | 116.8(3)   | O4C—P2C—O5C     | 115.8(3)   |
| O2B—P1B—O3B     | 110.9(3)   | O4C—P2C—O6C     | 110.5(3)   |
| O1B—P1B—O3B     | 106.2(3)   | O5C—P2C—O6C     | 109.9(3)   |
| O2B—P1B—P2B     | 105.47(19) | O4C—P2C—P1C     | 107.4(2)   |
| O1B—P1B—P2B     | 109.3(2)   | O5C—P2C—P1C     | 106.2(2)   |
| O3B—P1B—P2B     | 107.89(19) | O6C—P2C—P1C     | 106.4(2)   |
| O1A—P1A—P2A—O4A | -86.4(3)   | O3B—P1B—P2B—O5B | -172.5(3)  |
| O3A—P1A—P2A—O4A | 38.7(3)    | O2B—P1B—P2B—O6B | -172.3(3)  |
| O2A—P1A—P2A—O4A | 148.0(3)   | O1B—P1B—P2B—O6B | 61.4(3)    |
| O1A—P1A—P2A—O5A | 37.2(3)    | O3B—P1B—P2B—O6B | -53.7(3)   |
| O3A—P1A—P2A—O5A | 162.3(3)   | O1C—P1C—P2C—O4C | -83.4(3)   |
| O2A—P1A—P2A—O5A | -88.5(3)   | O2C—P1C—P2C—O4C | 150.9(3)   |
| O1A—P1A—P2A—O6A | 154.7(3)   | O3C—P1C—P2C—O4C | 41.6(3)    |
| O3A—P1A—P2A—O6A | -80.1(3)   | O1C—P1C—P2C—O5C | 41.1(3)    |
| O2A—P1A—P2A—O6A | 29.1(3)    | O2C—P1C—P2C—O5C | -84.6(3)   |
| O2B—P1B—P2B—O4B | -57.5(3)   | O3C—P1C—P2C—O5C | 166.1(3)   |
| O1B—P1B—P2B—O4B | 176.2(3)   | O1C—P1C—P2C—O6C | 158.2(3)   |
| O3B—P1B—P2B—O4B | 61.1(3)    | O2C—P1C—P2C—O6C | 32.5(3)    |
| O2B—P1B—P2B—O5B | 69.0(3)    | O3C—P1C—P2C—O6C | -76.8(3)   |
| O1B—P1B—P2B—O5B | -57.4(3)   |                 |            |

**Table S3.** Hydrogen-bond geometry (Å, °) for (1)

| <i>D</i> —H... <i>A</i>       | <i>D</i> —H | H... <i>A</i> | <i>D</i> ... <i>A</i> | <i>D</i> —H... <i>A</i> |
|-------------------------------|-------------|---------------|-----------------------|-------------------------|
| O3A—H3PA...O4C <sup>i</sup>   | 0.82(3)     | 1.74(3)       | 2.5547(16)            | 171(3)                  |
| O6A—H6PA...O4B                | 0.83(3)     | 1.74(3)       | 2.5620(17)            | 167(3)                  |
| O2B—H2PB...O5C                | 0.85(3)     | 1.62(3)       | 2.4616(17)            | 170(3)                  |
| O3B—H3PB...O2A                | 0.89(3)     | 1.61(3)       | 2.4988(16)            | 175(3)                  |
| O6B—H6PB...O1W                | 0.81(3)     | 1.80(3)       | 2.6115(17)            | 176(3)                  |
| O2C—H2PC...O5B                | 0.85(3)     | 1.65(3)       | 2.4978(17)            | 171(3)                  |
| O3C—H3PC...O5A <sup>ii</sup>  | 0.86(3)     | 1.67(3)       | 2.5266(17)            | 176(3)                  |
| O6C—H6PC...O2W                | 0.86(3)     | 1.70(3)       | 2.5630(17)            | 174(3)                  |
| N1A—H1NA...O1A                | 0.91(2)     | 1.77(2)       | 2.6788(18)            | 171(2)                  |
| N2A—H2A1...O5B <sup>iii</sup> | 0.91(3)     | 2.01(3)       | 2.9013(19)            | 167(2)                  |
| N2A—H2A2...O6A                | 0.85(3)     | 2.23(3)       | 3.0385(19)            | 158(2)                  |
| C3A—H3A...O1B <sup>iii</sup>  | 0.95        | 2.59          | 3.415(2)              | 145                     |
| N1B—H1NB...O4B                | 0.88(2)     | 1.93(2)       | 2.7846(18)            | 163(2)                  |
| N2B—H2B1...O2A                | 0.91(2)     | 1.99(2)       | 2.8669(19)            | 161(2)                  |
| N2B—H2B2...O1B <sup>iv</sup>  | 0.89(3)     | 1.99(3)       | 2.8676(19)            | 169(2)                  |
| N1C—H1NC...O4A                | 0.87(2)     | 1.84(2)       | 2.7017(19)            | 166(2)                  |
| N2C—H2C1...O3A                | 0.91(3)     | 2.06(3)       | 2.934(2)              | 162(2)                  |
| N2C—H2C2...O5C <sup>v</sup>   | 0.88(3)     | 2.23(3)       | 3.097(2)              | 168(2)                  |
| C3C—H3C...O2B <sup>v</sup>    | 0.95        | 2.60          | 3.331(2)              | 134                     |
| C3C—H3C...O1W <sup>v</sup>    | 0.95        | 2.64          | 3.320(2)              | 129                     |
| C6C—H6C...O1C <sup>vi</sup>   | 0.95        | 2.33          | 3.272(2)              | 173                     |
| N1D—H1ND...O4C                | 0.87(3)     | 1.89(3)       | 2.7468(18)            | 166(2)                  |
| N2D—H2D1...O5A <sup>vi</sup>  | 0.89(3)     | 1.99(3)       | 2.8811(19)            | 178(2)                  |
| N2D—H2D2...O1C                | 0.88(3)     | 2.10(3)       | 2.8878(19)            | 148(2)                  |
| C4D—H4D...O5B <sup>vii</sup>  | 0.95        | 2.58          | 3.468(2)              | 155                     |
| C6D—H6D...O3B <sup>viii</sup> | 0.95        | 2.45          | 3.176(2)              | 134                     |
| O1W—H1W1...O4A <sup>vi</sup>  | 0.84        | 2.03          | 2.8403(17)            | 161                     |
| O1W—H1W2...O1C                | 0.84        | 1.95          | 2.7861(17)            | 175                     |
| O2W—H2W1...O1B                | 0.84        | 1.99          | 2.8333(17)            | 178                     |
| O2W—H2W2...O1A <sup>iv</sup>  | 0.84        | 1.93          | 2.7577(16)            | 169                     |

Symmetry codes: (i)  $x, y, z-1$ ; (ii)  $x, y, z+1$ ; (iii)  $x, -y+1/2, z-1/2$ ; (iv)  $-x+2, -y+1, -z+1$ ; (v)  $x, -y+3/2, z-1/2$ ; (vi)  $-x+1, -y+1, -z+1$ ; (vii)  $-x+1, y+1/2, -z+3/2$ ; (viii)  $x, -y+3/2, z+1/2$ .

**Table S4.** Hydrogen-bond geometry (Å, °) for **(3)**

| <i>D</i> —H··· <i>A</i>       | <i>D</i> —H | H··· <i>A</i> | <i>D</i> ··· <i>A</i> | <i>D</i> —H··· <i>A</i> |
|-------------------------------|-------------|---------------|-----------------------|-------------------------|
| O2A—H2PA···O1B                | 0.84        | 1.68          | 2.501(6)              | 166                     |
| O3A—H3PA···O4C <sup>i</sup>   | 0.84        | 1.73          | 2.561(7)              | 172                     |
| O6A—H6PA···O5B                | 0.84        | 1.79          | 2.630(6)              | 174                     |
| O3B—H3PB···O5C                | 0.84        | 1.73          | 2.559(6)              | 170                     |
| O6B—H6PB···O5A                | 0.84        | 1.70          | 2.528(6)              | 169                     |
| O2C—H2PC···O4B                | 0.84        | 1.68          | 2.496(6)              | 162                     |
| O3C—H3PC···O4A <sup>ii</sup>  | 0.84        | 1.71          | 2.547(7)              | 174                     |
| O6C—H6PC···O2B                | 0.84        | 1.75          | 2.586(7)              | 171                     |
| N1A—H1NA···O1A                | 0.88        | 2.08          | 2.792(7)              | 138                     |
| N1A—H1NA···O5A                | 0.88        | 2.53          | 3.222(7)              | 136                     |
| N2A—H2A1···O5A                | 0.88        | 1.98          | 2.797(7)              | 153                     |
| N2A—H2A2···O4B <sup>iii</sup> | 0.88        | 2.02          | 2.884(7)              | 169                     |
| N1B—H1NB···O5B                | 0.88        | 1.93          | 2.741(7)              | 153                     |
| N2B—H2B1···O2B                | 0.88        | 2.14          | 2.886(7)              | 142                     |
| N2B—H2B2···O1B <sup>iv</sup>  | 0.88        | 2.04          | 2.899(7)              | 165                     |
| N1C—H1NC···O5C                | 0.88        | 1.81          | 2.669(7)              | 164                     |
| N2C—H2C1···O1C                | 0.88        | 2.13          | 2.950(7)              | 155                     |
| N2C—H2C2···O4A <sup>iii</sup> | 0.88        | 2.06          | 2.903(7)              | 160                     |
| C3C—H3C···O4A <sup>iii</sup>  | 0.95        | 2.62          | 3.350(8)              | 134                     |
| N1D—H1ND···O1W                | 0.88        | 1.79          | 2.67(5)               | 171                     |
| N2D—H2D1···O1C <sup>v</sup>   | 0.88        | 2.49          | 3.111(11)             | 128                     |
| N2D—H2D2···O4C <sup>v</sup>   | 0.88        | 2.30          | 3.058(11)             | 145                     |
| C3D—H3D···O1C <sup>vi</sup>   | 0.95        | 2.05          | 2.999(11)             | 174                     |
| C5D—H5D···O3A <sup>vii</sup>  | 0.95        | 2.58          | 3.418(13)             | 147                     |
| C6D—H6D···O1W <sup>viii</sup> | 0.95        | 2.50          | 3.11(4)               | 121                     |
| N1E—H1NE···O4C                | 0.88        | 2.49          | 3.30(3)               | 153                     |
| N2E—H2E1···O1A <sup>iv</sup>  | 0.88        | 2.24          | 2.93(3)               | 135                     |
| N2E—H2E2···O6C                | 0.88        | 2.46          | 3.11(3)               | 132                     |
| O1W—H1W1···O6C                | 0.84        | 1.98          | 2.71(4)               | 146                     |
| O1W—H1W2···O1A <sup>iv</sup>  | 0.84        | 1.96          | 2.76(4)               | 159                     |

Symmetry codes: (i)  $x-1, y, z$ ; (ii)  $x+1, y, z$ ; (iii)  $-x+1, -y+1, -z+1$ ; (iv)  $-x+1, y+1/2, -z+1/2$ ; (v)  $-x+2, y+1/2, -z+1/2$ ; (vi)  $x, -y+3/2, z-1/2$ ; (vii)  $-x+1, y-1/2, -z+1/2$ ; (viii)  $-x+2, y-1/2, -z+1/2$ .

**Table S5.** Selected geometric parameters (Å, °) for (4)

|                                        |            |                                        |            |
|----------------------------------------|------------|----------------------------------------|------------|
| P1—O1                                  | 1.5096(19) | P1—O3                                  | 1.577(2)   |
| P1—O2                                  | 1.513(2)   | P1—P1 <sup>i</sup>                     | 2.1754(14) |
| O1—P1—O2                               | 115.27(11) | O1—P1—P1 <sup>i</sup>                  | 108.21(9)  |
| O1—P1—O3                               | 107.96(11) | O2—P1—P1 <sup>i</sup>                  | 108.02(9)  |
| O2—P1—O3                               | 112.47(11) | O3—P1—P1 <sup>i</sup>                  | 104.26(9)  |
| O1—P1—P1 <sup>i</sup> —O1 <sup>i</sup> | 180        | O3—P1—P1 <sup>i</sup> —O2 <sup>i</sup> | 60.17(13)  |
| O2—P1—P1 <sup>i</sup> —O1 <sup>i</sup> | 54.58(13)  | O1—P1—P1 <sup>i</sup> —O3 <sup>i</sup> | 65.25(13)  |
| O3—P1—P1 <sup>i</sup> —O1 <sup>i</sup> | -65.25(13) | O2—P1—P1 <sup>i</sup> —O3 <sup>i</sup> | -60.17(13) |
| O1—P1—P1 <sup>i</sup> —O2 <sup>i</sup> | -54.58(13) | O3—P1—P1 <sup>i</sup> —O3 <sup>i</sup> | 180        |
| O2—P1—P1 <sup>i</sup> —O2 <sup>i</sup> | 180        |                                        |            |

Symmetry code: (i) -x+1, -y+1, -z+1.

**Table S6.** Selected geometric parameters (Å, °) for (5)

|                 |          |                                            |          |
|-----------------|----------|--------------------------------------------|----------|
| P1A—O3A         | 1.512(5) | P2A—O4A                                    | 1.573(5) |
| P1A—O2A         | 1.525(5) | P1B—O3B                                    | 1.499(5) |
| P1A—O1A         | 1.549(5) | P1B—O2B                                    | 1.514(5) |
| P1A—P2A         | 2.185(3) | P1B—O1B                                    | 1.566(5) |
| P2A—O6A         | 1.503(5) | P1B—P1B <sup>i</sup>                       | 2.177(4) |
| P2A—O5A         | 1.516(5) |                                            |          |
| O3A—P1A—O2A     | 113.2(3) | O6A—P2A—P1A                                | 105.6(2) |
| O3A—P1A—O1A     | 109.8(3) | O5A—P2A—P1A                                | 110.5(2) |
| O2A—P1A—O1A     | 112.2(3) | O4A—P2A—P1A                                | 102.9(2) |
| O3A—P1A—P2A     | 105.5(2) | O3B—P1B—O2B                                | 115.5(3) |
| O2A—P1A—P2A     | 107.4(2) | O3B—P1B—O1B                                | 112.0(3) |
| O1A—P1A—P2A     | 108.5(2) | O2B—P1B—O1B                                | 107.0(3) |
| O6A—P2A—O5A     | 115.8(3) | O3B—P1B—P1B <sup>i</sup>                   | 110.5(2) |
| O6A—P2A—O4A     | 110.0(3) | O2B—P1B—P1B <sup>i</sup>                   | 106.7(2) |
| O5A—P2A—O4A     | 111.2(3) | O1B—P1B—P1B <sup>i</sup>                   | 104.5(2) |
| O3A—P1A—P2A—O6A | -67.7(3) | O1B—P1B—P1B <sup>i</sup> —O1B <sup>i</sup> | 180      |
| O2A—P1A—P2A—O6A | 53.3(3)  | O2B—P1B—P1B <sup>i</sup> —O1B <sup>i</sup> | -66.9(3) |
| O1A—P1A—P2A—O6A | 174.7(3) | O3B—P1B—P1B <sup>i</sup> —O1B <sup>i</sup> | 59.3(3)  |
| O3A—P1A—P2A—O5A | 58.2(3)  | O1B—P1B—P1B <sup>i</sup> —O2B <sup>i</sup> | 66.9(3)  |
| O2A—P1A—P2A—O5A | 179.2(3) | O2B—P1B—P1B <sup>i</sup> —O2B <sup>i</sup> | 180      |
| O1A—P1A—P2A—O5A | -59.4(3) | O3B—P1B—P1B <sup>i</sup> —O2B <sup>i</sup> | -53.8(4) |
| O3A—P1A—P2A—O4A | 177.0(3) | O1B—P1B—P1B <sup>i</sup> —O3B <sup>i</sup> | -59.3(3) |
| O2A—P1A—P2A—O4A | -62.1(3) | O2B—P1B—P1B <sup>i</sup> —O3B <sup>i</sup> | 53.8(4)  |
| O1A—P1A—P2A—O4A | 59.3(3)  | O3B—P1B—P1B <sup>i</sup> —O3B <sup>i</sup> | 180      |

Symmetry code: (i) -x+1, -y+2, -z+1.



**Table S7.** Hydrogen-bond geometry (Å, °) for (4)

| <i>D</i> —H··· <i>A</i>      | <i>D</i> —H | H··· <i>A</i> | <i>D</i> ··· <i>A</i> | <i>D</i> —H··· <i>A</i> |
|------------------------------|-------------|---------------|-----------------------|-------------------------|
| O3—H3P···O2 <sup>ii</sup>    | 0.81(5)     | 1.72(5)       | 2.522(3)              | 169(5)                  |
| N1—H1N···O1                  | 0.93(4)     | 1.73(4)       | 2.658(3)              | 173(3)                  |
| N2—H2N1···O3                 | 0.90(4)     | 2.18(4)       | 3.074(4)              | 173(3)                  |
| N2—H2N2···O2 <sup>iii</sup>  | 0.87(4)     | 2.04(4)       | 2.900(3)              | 171(3)                  |
| C3—H3···O1 <sup>iii</sup>    | 0.95        | 2.44          | 3.377(4)              | 168                     |
| O1W—H1W1···O1                | 0.84        | 1.98          | 2.811(3)              | 170                     |
| O1W—H1W2···O1W <sup>iv</sup> | 0.84        | 2.05          | 2.8922(19)            | 178                     |

Symmetry codes: (ii)  $-x+1, -y+1, -z$ ; (iii)  $x-1, y, z$ ; (iv)  $x, -y+1/2, z+1/2$ .

**Table S8.** Hydrogen-bond geometry (Å, °) for (5)

| <i>D</i> —H··· <i>A</i>       | <i>D</i> —H | H··· <i>A</i> | <i>D</i> ··· <i>A</i> | <i>D</i> —H··· <i>A</i> |
|-------------------------------|-------------|---------------|-----------------------|-------------------------|
| O1A—H1PA···O2A <sup>ii</sup>  | 0.84        | 1.71          | 2.517(6)              | 160                     |
| O4A—H4PA···O2B <sup>i</sup>   | 0.84        | 1.84          | 2.627(6)              | 155                     |
| O1B—H1PB···O5A                | 0.84        | 1.73          | 2.567(6)              | 173                     |
| N1A—H1NA···O3A                | 0.88        | 1.80          | 2.672(7)              | 174                     |
| N2A—H2A2···O3A <sup>iii</sup> | 0.88        | 1.95          | 2.763(8)              | 153                     |
| N2A—H2A1···O2A                | 0.88        | 2.20          | 3.052(7)              | 162                     |
| C3A—H3A···O1A <sup>iii</sup>  | 0.95        | 2.52          | 3.436(9)              | 161                     |
| N1B—H1NB···O6A                | 0.88        | 1.83          | 2.702(9)              | 174                     |
| N2B—H2B2···O6A <sup>iv</sup>  | 0.88        | 2.42          | 3.000(9)              | 124                     |
| N2B—H2B1···O5A                | 0.88        | 2.18          | 3.038(9)              | 166                     |
| C6B—H6B···O5A <sup>iii</sup>  | 0.95        | 2.41          | 3.350(10)             | 173                     |
| N1C—H1NC···O2B                | 0.88        | 1.83          | 2.688(8)              | 163                     |
| N2C—H2C2···O1B <sup>iii</sup> | 0.88        | 2.14          | 3.004(8)              | 166                     |
| N2C—H2C1···O3B                | 0.88        | 1.95          | 2.820(9)              | 170                     |
| C3C—H3C···O2B <sup>iii</sup>  | 0.95        | 2.20          | 3.119(9)              | 164                     |
| C6C—H6C···O1A <sup>i</sup>    | 0.95        | 2.41          | 3.137(9)              | 133                     |

Symmetry codes: (i)  $-x+1, -y+2, -z+1$ ; (ii)  $-x+2, -y+2, -z+1$ ; (iii)  $x, -y+3/2, z-1/2$ ; (iv)  $x, -y+3/2, z+1/2$ .

**Table S9.** Selected geometric parameters (Å, °) for (6)

|                                            |            |                                              |            |
|--------------------------------------------|------------|----------------------------------------------|------------|
| P1A—O1A                                    | 1.5167(15) | P1B—O1B                                      | 1.4894(15) |
| P1A—O2A                                    | 1.5192(14) | P1B—O2B                                      | 1.5425(15) |
| P1A—O3A                                    | 1.5579(16) | P1B—O3B                                      | 1.5515(16) |
| P1A—P1A <sup>i</sup>                       | 2.1750(11) | P1B—P1B <sup>ii</sup>                        | 2.1748(12) |
| O1A—P1A—O2A                                | 114.30(8)  | O1B—P1B—O2B                                  | 116.13(9)  |
| O1A—P1A—O3A                                | 113.99(8)  | O1B—P1B—O3B                                  | 112.85(8)  |
| O2A—P1A—O3A                                | 108.45(8)  | O2B—P1B—O3B                                  | 105.95(8)  |
| O1A—P1A—P1A <sup>i</sup>                   | 106.62(7)  | O1B—P1B—P1B <sup>ii</sup>                    | 110.06(7)  |
| O2A—P1A—P1A <sup>i</sup>                   | 107.04(7)  | O2B—P1B—P1B <sup>ii</sup>                    | 105.73(7)  |
| O3A—P1A—P1A <sup>i</sup>                   | 105.86(7)  | O3B—P1B—P1B <sup>ii</sup>                    | 105.33(7)  |
| O1A—P1A—P1A <sup>i</sup> —O1A <sup>i</sup> | 180        | O1B—P1B—P1B <sup>ii</sup> —O1B <sup>ii</sup> | 180        |
| O2A—P1A—P1A <sup>i</sup> —O1A <sup>i</sup> | 57.27(9)   | O2B—P1B—P1B <sup>ii</sup> —O1B <sup>ii</sup> | -53.84(10) |
| O3A—P1A—P1A <sup>i</sup> —O1A <sup>i</sup> | -58.27(9)  | O3B—P1B—P1B <sup>ii</sup> —O1B <sup>ii</sup> | 58.08(10)  |
| O1A—P1A—P1A <sup>i</sup> —O2A <sup>i</sup> | -57.27(9)  | O1B—P1B—P1B <sup>ii</sup> —O2B <sup>ii</sup> | 53.84(10)  |
| O2A—P1A—P1A <sup>i</sup> —O2A <sup>i</sup> | 180        | O2B—P1B—P1B <sup>ii</sup> —O2B <sup>ii</sup> | 180        |
| O3A—P1A—P1A <sup>i</sup> —O2A <sup>i</sup> | 64.45(9)   | O3B—P1B—P1B <sup>ii</sup> —O2B <sup>ii</sup> | -68.08(9)  |
| O1A—P1A—P1A <sup>i</sup> —O3A <sup>i</sup> | 58.27(9)   | O1B—P1B—P1B <sup>ii</sup> —O3B <sup>ii</sup> | -58.08(10) |
| O2A—P1A—P1A <sup>i</sup> —O3A <sup>i</sup> | -64.45(9)  | O2B—P1B—P1B <sup>ii</sup> —O3B <sup>ii</sup> | 68.08(9)   |
| O3A—P1A—P1A <sup>i</sup> —O3A <sup>i</sup> | 180        | O3B—P1B—P1B <sup>ii</sup> —O3B <sup>ii</sup> | 180        |

Symmetry codes: (i)  $-x, -y+1, -z+1$ ; (ii)  $-x-1, -y, -z+1$ .**Table S10.** Selected geometric parameters (Å, °) for (7)

|                                        |            |                                        |            |
|----------------------------------------|------------|----------------------------------------|------------|
| P1—O1                                  | 1.5018(14) | P1—O3                                  | 1.5788(14) |
| P1—O2                                  | 1.5195(13) | P1—P1 <sup>i</sup>                     | 2.1824(9)  |
| O1—P1—O2                               | 117.21(8)  | O1—P1—P1 <sup>i</sup>                  | 108.98(6)  |
| O1—P1—O3                               | 111.76(8)  | O2—P1—P1 <sup>i</sup>                  | 106.56(6)  |
| O2—P1—O3                               | 106.64(7)  | O3—P1—P1 <sup>i</sup>                  | 104.89(6)  |
| O1—P1—P1 <sup>i</sup> —O1 <sup>i</sup> | 180        | O3—P1—P1 <sup>i</sup> —O2 <sup>i</sup> | -67.16(8)  |
| O2—P1—P1 <sup>i</sup> —O1 <sup>i</sup> | -52.65(9)  | O1—P1—P1 <sup>i</sup> —O3 <sup>i</sup> | -60.19(8)  |
| O3—P1—P1 <sup>i</sup> —O1 <sup>i</sup> | 60.19(8)   | O2—P1—P1 <sup>i</sup> —O3 <sup>i</sup> | 67.16(8)   |
| O1—P1—P1 <sup>i</sup> —O2 <sup>i</sup> | 52.65(9)   | O3—P1—P1 <sup>i</sup> —O3 <sup>i</sup> | 180        |
| O2—P1—P1 <sup>i</sup> —O2 <sup>i</sup> | 180        |                                        |            |

Symmetry code: (i)  $-x+2, -y+1, -z+1$ .

**Table S11.** Hydrogen-bond geometry (Å, °) for (6)

| <i>D</i> —H... <i>A</i>       | <i>D</i> —H | H... <i>A</i> | <i>D</i> ... <i>A</i> | <i>D</i> —H... <i>A</i> |
|-------------------------------|-------------|---------------|-----------------------|-------------------------|
| O3A—H3PA...O1B <sup>ii</sup>  | 0.84        | 1.70          | 2.536(2)              | 174                     |
| O2B—H2PB...O2A <sup>iii</sup> | 0.84        | 1.69          | 2.528(2)              | 175                     |
| O3B—H3PB...O1A                | 0.84        | 1.62          | 2.459(2)              | 172                     |
| N1—H1N...O2A                  | 0.78(3)     | 1.99(3)       | 2.769(3)              | 179(3)                  |
| N2—H2N1...O1A                 | 0.83(3)     | 2.17(3)       | 2.993(3)              | 173(3)                  |
| N2—H2N2...O3B <sup>iv</sup>   | 0.91(3)     | 2.04(3)       | 2.941(3)              | 180(3)                  |
| C6—H6...O2A <sup>v</sup>      | 0.95        | 2.56          | 3.372(3)              | 144                     |

Symmetry codes: (ii)  $-x-1, -y, -z+1$ ; (iii)  $-x, -y, -z+1$ ; (iv)  $-x, -y+1, -z+2$ ; (v)  $-x+1, -y+1, -z+1$ .

**Table S12.** Hydrogen-bond geometry (Å, °) for (7)

| <i>D</i> —H... <i>A</i>      | <i>D</i> —H | H... <i>A</i> | <i>D</i> ... <i>A</i> | <i>D</i> —H... <i>A</i> |
|------------------------------|-------------|---------------|-----------------------|-------------------------|
| O3—H3P...N1B                 | 0.83(3)     | 1.83(3)       | 2.640(2)              | 168(3)                  |
| N1A—H1NA...O2                | 0.86(4)     | 1.83(4)       | 2.682(2)              | 174(3)                  |
| N2A—H2A1...O2 <sup>ii</sup>  | 0.94(3)     | 1.91(3)       | 2.833(2)              | 167(3)                  |
| N2A—H2A2...O1 <sup>i</sup>   | 0.88(3)     | 1.98(4)       | 2.833(2)              | 163(3)                  |
| N2B—H2B1...O1 <sup>iii</sup> | 0.93(3)     | 1.95(3)       | 2.864(2)              | 170(2)                  |
| N2B—H2B2...O2 <sup>i</sup>   | 0.89(3)     | 2.13(3)       | 2.962(2)              | 157(2)                  |

Symmetry codes: (i)  $-x+2, -y+1, -z+1$ ; (ii)  $x, -y+3/2, z-1/2$ ; (iii)  $x, -y+1/2, z-1/2$ .
